# Supplementary material
Source: PubMed Central journal article supplement (PMC3147459)
Supplement: supp_77_15_5384__1.pdf [file supp_77_15_5384__1.pdf]

1 **Table S1.** Green (G), yellow (Y), and total (Tot.) CFU ml<sup>-1</sup> enumerated on TCBS agar (rounded to two significant digits or a maximum of two decimal places) and the  
2 temperature (T), salinity (S), dissolved oxygen (D.O.), turbidity (Turb.), and pH at each station (Sta.) on each of the four main samplings dates (n.d. = no data due to equipment  
3 malfunction). The sum of green and yellow colonies does not exactly agree with total colonies in some cases as a result of independent rounding of the total values.

| Sta. | 2005 October 11         |      |     |      |        | 2006 January 27         |      |      |      |        |       |             | 2006 March 28 |                         |      |      |      |        |       | 2006 September 01 |      |                         |      |      |      |        |       |             |      |
|------|-------------------------|------|-----|------|--------|-------------------------|------|------|------|--------|-------|-------------|---------------|-------------------------|------|------|------|--------|-------|-------------------|------|-------------------------|------|------|------|--------|-------|-------------|------|
|      | CFU (ml <sup>-1</sup> ) |      |     | S    | T (°C) | CFU (ml <sup>-1</sup> ) |      |      | S    | T (°C) | D. O. | Turb. (NTU) | pH            | CFU (ml <sup>-1</sup> ) |      |      | S    | T (°C) | D. O. | Turb. (NTU)       | pH   | CFU (ml <sup>-1</sup> ) |      |      | S    | T (°C) | D. O. | Turb. (NTU) | pH   |
| G    | Y                       | Tot. | G   |      |        | Y                       | Tot. | G    |      |        |       |             |               | Y                       | Tot. | G    |      |        |       |                   |      | Y                       | Tot. | G    |      |        |       |             |      |
| A1   | 15                      | 12   | 27  | 5.45 | 24.81  | 0.48                    | 6.3  | 6.8  | 7.99 | 12.76  | 9.75  | 10.0        | 8.05          | 0.56                    | 7.7  | 8.3  | 6.54 | 17.6   | 8.21  | 12.5              | 8.08 | 34                      | 31   | 65   | 8.29 | 28.88  | 9.02  | 6.9         | 8.82 |
| A2   | 3.0                     | 2.3  | 5.3 | 5.33 | 24.95  |                         |      |      |      |        |       |             |               |                         |      |      |      |        |       |                   |      |                         |      |      |      |        |       |             |      |
| A3   | 3.5                     | 1.8  | 5.3 | 5.38 | 25.12  |                         |      |      |      |        |       |             |               |                         |      |      |      |        |       |                   |      |                         |      |      |      |        |       |             |      |
| A4   | 2.2                     | 1.3  | 3.5 | 5.26 | 25.16  |                         |      |      |      |        |       |             |               |                         |      |      |      |        |       |                   |      |                         |      |      |      |        |       |             |      |
| B1   | 16                      | 7.7  | 24  | 5.42 | 26.20  | 0.44                    | 3.7  | 4.1  | 6.86 | 13.56  | 10.16 | 13.8        | 8.11          | 2.8                     | 10   | 13   | 6.79 | 17.44  | 8.38  | 4.4               | 8.24 | 52                      | 52   | 104  | n.d. | n.d.   | n.d.  | n.d.        | n.d. |
| B2   | 4.8                     | 2.9  | 7.7 | 5.45 | 25.01  | 0.20                    | 3.9  | 4.1  | 7.02 | 13.73  | 9.94  | 9.5         | 8.12          | 0.24                    | 0.12 | 0.36 | 6.68 | 17.54  | 8.51  | 4.3               | 8.33 | 12                      | 1.2  | 13   | 8.94 | 29.74  | 7.48  | 7.4         | 8.55 |
| B3   | 1.0                     | 0.48 | 1.5 | 6.21 | 25.76  | 0.08                    | 0.28 | 0.36 | 7.63 | 13.47  | 8.80  | 3.4         | 8.10          | 0.12                    | 0.00 | 0.12 | 6.63 | 17.55  | 8.41  | 4.6               | 8.25 | 9.3                     | 0.36 | 9.7  | 9.14 | 29.64  | 7.28  | 8.1         | 8.51 |
| B4   | 0.84                    | 0.44 | 1.3 | 6.86 | 25.62  |                         |      |      |      |        |       |             |               |                         |      |      |      |        |       |                   |      |                         |      |      |      |        |       |             |      |
| C1   | 4.5                     | 3.0  | 7.5 | 5.55 | 25.94  |                         |      |      |      |        |       |             |               |                         |      |      |      |        |       |                   |      |                         |      |      |      |        |       |             |      |
| C2   | 3.7                     | 1.6  | 5.3 | 5.73 | 25.85  |                         |      |      |      |        |       |             |               |                         |      |      |      |        |       |                   |      |                         |      |      |      |        |       |             |      |
| C3   | 4.3                     | 1.8  | 6.1 | 5.91 | 25.75  |                         |      |      |      |        |       |             |               |                         |      |      |      |        |       |                   |      |                         |      |      |      |        |       |             |      |
| C4   | 1.8                     | 0.16 | 2.0 | 6.48 | 26.48  |                         |      |      |      |        |       |             |               |                         |      |      |      |        |       |                   |      |                         |      |      |      |        |       |             |      |
| D1   |                         |      |     |      |        | 0.12                    | 4.6  | 4.7  | 7.12 | 13.99  | 9.21  | 8.1         | 9.35          | 0.76                    | 3.4  | 4.2  | 6.76 | 17.0   | 8.65  | 3.8               | 8.19 | 20                      | 8.8  | 29   | 8.91 | 29.46  | 7.54  | 6.6         | 8.69 |
| D2   |                         |      |     |      |        | 0.24                    | 5.7  | 5.9  | 7.26 | 13.75  | 10.13 | 12.1        | 8.07          | 0.16                    | 3.0  | 3.2  | 6.79 | 16.88  | 8.41  | 4                 | 8.15 | 31                      | 8.4  | 39   | 8.96 | 29.51  | 7.33  | 6.1         | 8.63 |
| D3   |                         |      |     |      |        | 0.2                     | 0.24 | 0.44 | 8.19 | 13.21  | 9.97  | 6.9         | 8.01          | 0.08                    | 0.12 | 0.2  | 6.70 | 17.0   | 8.36  | 4.7               | 8.26 | 3.9                     | 0.72 | 4.62 | 9.21 | 29.64  | 7.30  | 3.7         | 8.67 |
| D4   |                         |      |     |      |        | 0.08                    | 0.24 | 0.32 | 7.86 | 13.5   | 9.13  | 4.0         | 8.09          | 0.24                    | 0.00 | 0.24 | 6.78 | 17.47  | 8.17  | 4.1               | 8.26 | 1.9                     | 0.16 | 2.1  | 9.61 | 29.35  | 7.18  | 1.6         | 8.66 |
| E1   |                         |      |     |      |        | 0.04                    | 3.3  | 3.3  | 8.20 | 13.26  | 0.08  | 9.1         | 7.99          | 0.36                    | 4.2  | 4.56 | 7.03 | 17.0   | 8.35  | 2.9               | 8.14 | 7.2                     | 2.0  | 9.2  | 9.80 | 29.34  | 7.15  | 2.5         | 8.08 |
| E2   |                         |      |     |      |        | 0.00                    | 2.7  | 2.7  | 8.09 | 13.25  | 0.47  | 15.9        | 8.15          | 0.24                    | 0.84 | 1.1  | 7.06 | 16.94  | 8.06  | 3.1               | 8.23 | 39                      | 10   | 49   | 10.0 | 29.29  | 9.26  | 4.3         | 8.61 |
| E3   |                         |      |     |      |        | 0.24                    | 1.5  | 1.7  | 8.01 | 13.54  | 9.66  | 12.8        | 8.1           | 0.28                    | 0.56 | 0.84 | 7.05 | 16.87  | 8.28  | 3.2               | 8.26 | 29                      | 6.0  | 35   | 9.39 | 29.13  | 6.55  | 6.4         | 8.63 |
| E4   |                         |      |     |      |        | 0.12                    | 0.48 | 0.60 | 8.32 | 12.73  | 9.59  | 10.7        | 8.08          | 0.12                    | 0.08 | 0.2  | 6.88 | 17.26  | 8.18  | 5.6               | 8.28 | 12                      | 0.40 | 12.4 | 8.88 | 29.37  | 6.85  | 7.8         | 8.61 |
| CS   | 2.6                     | 0.40 | 3.0 | 7.76 | 25.08  | 0.04                    | 0.08 | 0.12 | 7.39 | 13.62  | 10.04 | 9.5         | 8.1           | 0.16                    | 0.08 | 0.24 | 7.11 | 18.15  | 8.24  | 4.2               | 8.37 | 1.2                     | 0.24 | 1.4  | 8.88 | 29.81  | 7.18  | 8.7         | 8.39 |
| S1   | 0.60                    | 55   | 56  | 5    |        | 0.08                    | 2.8  | 2.9  | 0    |        |       |             |               | 0.64                    | 2.7  | 3.3  | 2    |        |       |                   |      | 0                       | 12   | 12   | 0    |        |       |             |      |
| S3   | 14                      | 3.4  | 17  | 11   |        | 1.8                     | 4.8  | 6.6  | 8    |        |       |             |               | 2.2                     | 6.8  | 9.0  | 10   |        |       |                   |      | 300                     | 56   | 350  | 10   |        |       |             |      |
